# Supplementary material
Source: PubMed Central journal article supplement (PMC3216446)
Supplement: supp_111074_chron-laupacis-2-at.pdf [file supp_111074_chron-laupacis-2-at.pdf]

## Appendix 2 (as supplied by the authors): Detailed literature search

### MEDLINE Search Strategy

- 1 Multiple Sclerosis/
- 2 Multiple Sclerosis, Chronic Progressive/
- 3 Multiple Sclerosis, Relapsing-Remitting/
- 4 (multiple adj sclerosis).mp.
- 5 Neuromyelitis Optica/
- 6 (neuromyelitis adj optica).mp.
- 7 Myelitis, Transverse/
- 8 (transverse adj myelitis).mp.
- 9 Demyelinating Diseases/
- 10 (demyelinating adj (disease? or disorder?)).mp.
- 11 Encephalomyelitis, Acute Disseminated/
- 12 ADEM.tw.
- 13 encephalomyelitis.tw.
- 14 Optic Neuritis/
- 15 (optic adj neuriti\$).mp.
- 16 devic.tw.
- 17 "clinically isolated syndrome?".tw.
- 18 or/1-17
- 19 exp Ultrasonography/
- 20 ultrasonogra\$.mp.
- 21 ultrasound\$.tw.
- 22 Doppler\$.mp.
- 23 Phlebography/
- 24 phlebogra\$.mp.
- 25 venogra\$.mp.
- 26 Magnetic Resonance Angiography/
- 27 "magnetic resonance angiogra\$.tw.
- 28 "magnetic resonance arteriogra\$.tw.
- 29 Cerebral Angiography/
- 30 (cerebral adj angiogra\$.tw.
- 31 (cerebral adj arteriogra\$.tw.
- 32 (venous adj angiogra\$.tw.
- 33 (venous adj arteriogra\$.tw.
- 34 (brain adj angiogra\$.tw.
- 35 (brain adj arteriogra\$.tw.
- 36 or/19-35
- 37 18 and 36
- 38 Animals/ not (Animals/ and Humans/)
- 39 37 not 38
- 40 limit 39 to yr="2005 -Current"

## EMBASE Search Strategy

- 1 Multiple Sclerosis/
- 2 (multiple adj sclerosis).mp.
- 3 Myeloptic Neuropathy/
- 4 (myeloptic adj neuropath\$).tw.
- 5 (neuromyelitis adj optica).mp.
- 6 Myelitis/
- 7 (transverse adj myelitis).mp.
- 8 Demyelinating Disease/
- 9 (demyelinating adj (disease? or disorder?)).tw.
- 10 Acute Disseminated Encephalomyelitis/
- 11 ADEM.tw.
- 12 Encephalomyelitis/
- 13 encephalomyelitis.tw.
- 14 Optic Neuritis/
- 15 (optic adj neuriti\$).tw.
- 16 devic.tw.
- 17 "clinically isolated syndrome?".tw.
- 18 or/1-17
- 19 ultrasonogra\$.mp.
- 20 Ultrasound/
- 21 ultrasound\$.mp.
- 22 Doppler\$.mp.
- 23 exp Phlebography/
- 24 phlebogra\$.mp.
- 25 venogra\$.mp.
- 26 magnetic resonance angiography/
- 27 "magnetic resonance angiogra\$".tw.
- 28 "magnetic resonance arteriogra\$".tw.
- 29 exp brain angiography/
- 30 (cerebral adj angiogra\$).tw.
- 31 (brain adj angiogra\$).tw.
- 32 (brain adj arteriogra\$).tw.
- 33 (venous adj angiogra\$).tw.
- 34 (venous adj arteriogra\$).tw.
- 35 or/19-34
- 36 18 and 35
- 37 Nonhuman/
- 38 36 not 37
- 39 limit 38 to yr="2005 -Current"
