# Supplementary material
Source: PubMed Central journal article supplement (PMC3216446)
Supplement: supp_111074_chron-laupacis-3-at.pdf [file supp_111074_chron-laupacis-3-at.pdf]

### Appendix 3: Sensitivity analyses of results from meta-analysis of the association between chronic cerebrospinal venous insufficiency and multiple sclerosis (MS) (part 1 of 2)

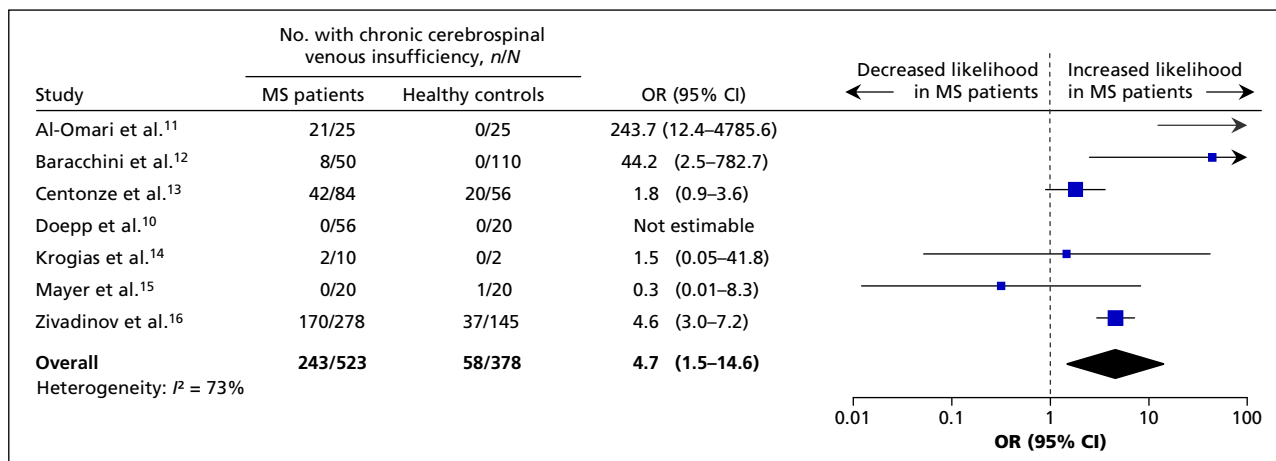

Figure A: Sensitivity analysis of diagnosis of chronic cerebrospinal venous insufficiency in patients with MS versus healthy controls, with study by Zamboni et al.<sup>4</sup> removed.

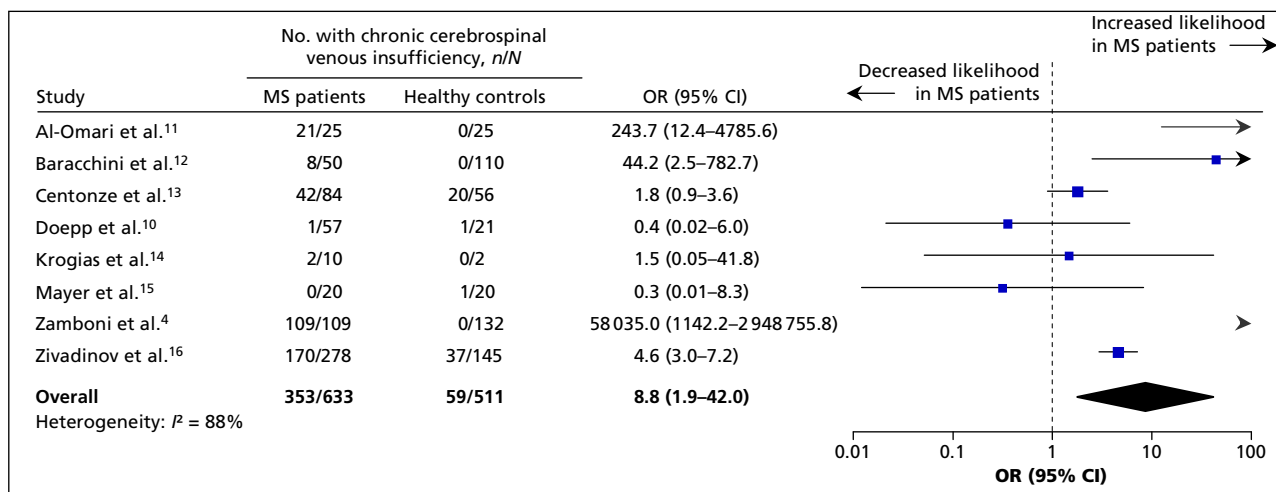

Figure B: Sensitivity analysis of diagnosis of chronic cerebrospinal venous insufficiency in patients with MS versus healthy controls, with study by Doepf et al.<sup>10</sup> included (1 added to each cell).

Note: Citations are available in the main article. CI = confidence interval, OR = odds ratio.

### Appendix 3: continued (part 2 of 2)

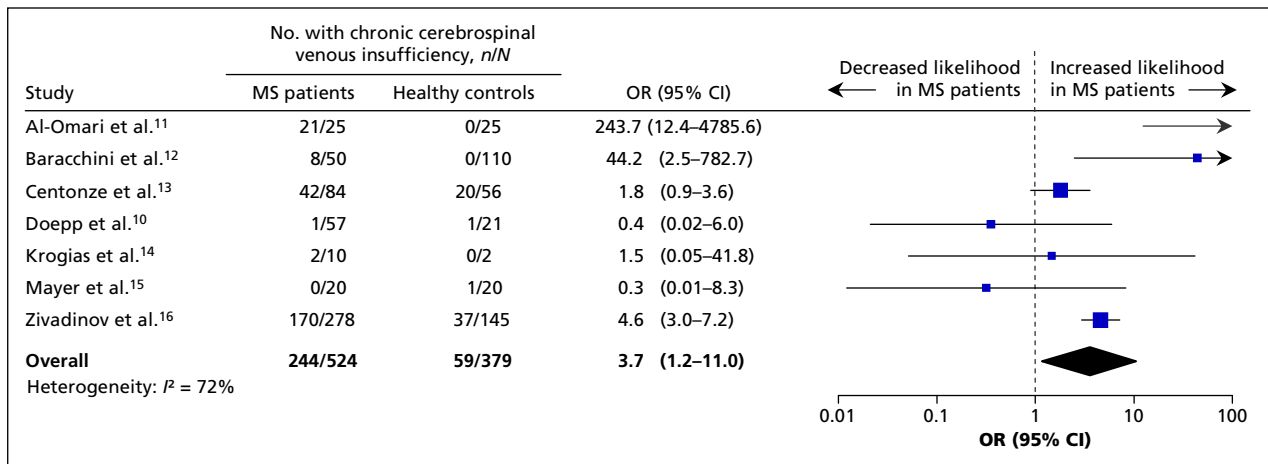

**Figure C: Sensitivity analysis of diagnosis of chronic cerebrospinal venous insufficiency in patients with MS versus healthy controls, with study by Zamboni et al.<sup>4</sup> removed and study by Doepp et al.<sup>10</sup> included (1 added to each cell).**

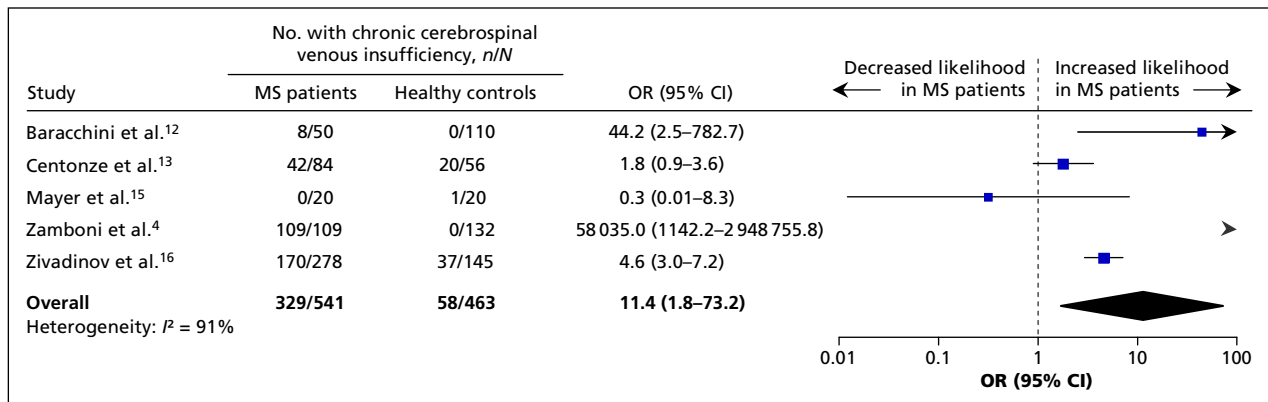

**Figure D: Sensitivity analysis of diagnosis of chronic cerebrospinal venous insufficiency in patients with MS versus healthy controls, with nonblinded studies (by Al-Omari et al.,<sup>11</sup> Doepp et al.<sup>10</sup> and Krogias et al.<sup>14</sup>) removed.**

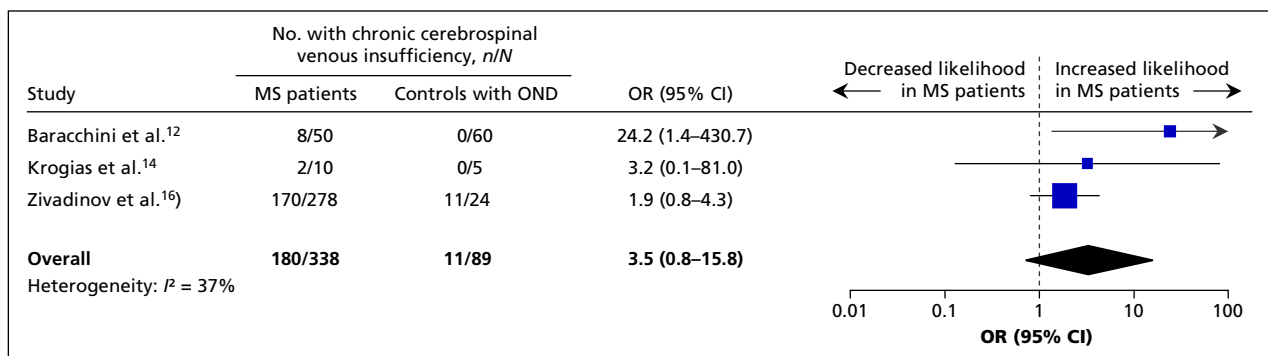

**Figure E: Sensitivity analysis of diagnosis of chronic cerebrospinal venous insufficiency in patients with MS versus controls with OND (other neurologic disease), with study by Zamboni et al.<sup>4</sup> removed.**

Note: Citations are available in the main article. CI = confidence interval, OR = odds ratio.
